# Supplementary material for: Uncovering Novel Plasma Membrane Carboxylate Transporters in the Yeast Cyberlindnera jadinii
Source: MDPI journal article supplement (doi:10.3390/jof8010051), 2022-01-05

## Uncovering novel plasma membrane carboxylate transporters in the yeast *Cyberlindnera jadinii*

Sousa-Silva, M.<sup>1,2</sup>, Soares, P.<sup>1,2</sup>, Alves, J.<sup>1,2</sup>, Vieira, D.<sup>1,2</sup>, Casal, M.<sup>1,2</sup>, Soares-Silva, I.<sup>1,2\*</sup>

<sup>1</sup>Institute of Science and Innovation for Bio-Sustainability (IB-S), University of Minho, Portugal

<sup>2</sup>Centre of Molecular and Environmental Biology (CBMA), Department of Biology, University of Minho, Campus de Gualtar, 4710-057 Braga, Portugal

\*Corresponding author: Isabel Soares-Silva; [ijoao@bio.uminho.pt](mailto:ijoao@bio.uminho.pt)

## Supplementary material

**Table S1.** Identification of *C. jadinii* carboxylate transporter homologs of the distinct transporter families. For ScAto1 and ScJen1 homologs, homology search was performed by BlastP. Protein conserved domains were determined in the Conserved Domain Database (CDD) and the number of transmembrane segments (TMSs) was determined with TMHMM Server v.2.0.

| Accession number | Query                                            | Query cover | Identity | E-value            | TMSs | ID gene |
|------------------|--------------------------------------------------|-------------|----------|--------------------|------|---------|
| XP_020070445.1   | NP_009936.1<br>Ady2p<br>[ <i>S. cerevisiae</i> ] | 98 %        | 56 %     | 2e <sup>-99</sup>  | 4    | CjAto1  |
| XP_020073179.1   |                                                  | 96 %        | 57 %     | 2e <sup>-96</sup>  | 6    | CjAto2  |
| XP_020073031.1   |                                                  | 91 %        | 55 %     | 2e <sup>-100</sup> | 5    | CjAto3  |
| XP_020073178.1   |                                                  | 98 %        | 57 %     | 4e <sup>-109</sup> | 5    | CjAto4  |
| XP_020067765.1   |                                                  | 94 %        | 41 %     | 6e <sup>-72</sup>  | 6    | CjAto5  |
| CEP23088.1       | NP_012705.1<br>Jen1p<br>[ <i>S. cerevisiae</i> ] | 82 %        | 58 %     | 0                  | 10   | CjJen1  |
| CEP21966.1       |                                                  | 85 %        | 51 %     | 1e <sup>-175</sup> | 11   | CjJen2  |
| CEP22358.1       |                                                  | 77 %        | 40 %     | 1e <sup>-119</sup> | 12   | CjJen3  |
| CEP21989.1       |                                                  | 76 %        | 41 %     | 5e <sup>-116</sup> | 12   | CjJen4  |
| CEP21602.1       |                                                  | 67 %        | 43 %     | 1e <sup>-103</sup> | 10   | CjJen5  |
| CEP25129.1       |                                                  | 82 %        | 41 %     | 8e <sup>-127</sup> | 12   | CjJen6  |

  

| Accession number | Domain designation           | Accession | Description                                                                                   | E-value               | TM Ss | ID gene   |
|------------------|------------------------------|-----------|-----------------------------------------------------------------------------------------------|-----------------------|-------|-----------|
| XP_020067635.1   | MFS_MCT_SL C16               | cd17352   | Monocarboxylate transporter (MCT) family of the Major Facilitator Superfamily of transporters | 2.27e <sup>-64</sup>  | 12    | CjSlc16   |
| XP_020068154.1   | SLC5-6-like_sbd super family | cl00456   | Solute carrier families 5 and 6-like; solute binding domain                                   | 3.25e <sup>-14</sup>  | 11    | CjSlc5    |
| XP_020068891.1   | TDT super family             | cl04176   | Tellurite-resistance/Dicarboxylate Transporter (TDT) family                                   | 1.19e <sup>-83</sup>  | 9     | CjTDT     |
| XP_020069270.1   | SLC13_perme ase              | cd01115   | Permease SLC13 (solute carrier 13); Sodium/dicarboxylate cotransporter NaDC-1                 | 1.56e <sup>-98</sup>  | 12    | CjSlc13-1 |
| XP_020073044.1   |                              |           | Permease SLC13 (solute carrier 13); Sodium/dicarboxylate cotransporter NaDC-1                 | 7.26e <sup>-103</sup> | 12    | CjSlc13-2 |

**Table S2.** Oligonucleotides used for strain construction, cloning and expression.

| Name                | Sequence                     |
|---------------------|------------------------------|
| p416-CJAd1_fwd      | GCAGGATCCATGTCAGACAAGGAAAGC  |
| p416-CJAd1_rev      | GCAGAATTCCTAGGAGTGCACCTGAGC  |
| p416-CJAd2_fwd      | GCAGGATCCATGTCTAGTATTAATGAG  |
| p416-CJAd2_rev      | GCAGAATTCTCACAAATGGCTAGCACC  |
| p416-CJAd3_fwd      | GCAGGATCCATGGCCGCAACGTTGAC   |
| p416-CJAd3_rev      | GCAGAATTCTCAGGCACGCTTTGCACC  |
| p416-CJAd4_fwd      | GCAGGATCCATGTCGGACAAGGAAAAC  |
| p416-CJAd4_rev      | GCAGAATTCTCAAGAACGCTTTGCACC  |
| p416-CJjen1_fwd     | GCA GGATCCATGCACAAACTGAAGAG  |
| p416-CJjen1_rev     | GCAGAATTCTCACTTCTTCTCCTGTGG  |
| p416-CJjen2-new_Fwd | GCAGGATCCATGACTTCACCATTGCCT  |
| p416-CJjen2-new_Rev | GCACTCGAGTCACTCACTTGAAGAGCC  |
| p416-CJjen3_fwd     | GCAGAATTCATGGCAATGTCTGATGTT  |
| p416-CJjen3_rev     | GCAGAATTCTCAGGTTTTTTCATTATG  |
| p416-CJjen4-new_Fwd | GCAGGATCC ATGACTGCTGGGAGATAC |
| p416-CJjen4-new_Rev | GCACTCGAGCTAGTCTCTAGCAGATTC  |
| p416-CJjen5_fwd     | GCAGGATCCATGGACTGGGATGCTTTC  |
| p416-CJjen5_rev     | GCAGAATTCTCACTTTGGCTCTATCTT  |
| Cut-Jen6_Fwd        | GCCTCTAGAATGGGATTCAAGACGTAC  |
| Cut-Jen6_Rev        | GCCGAATTCTCATTTAACCTCAGAAAC  |
| ct1.635_Fwd         | GCCACTAGTATGACTGAAATCATCACT  |
| ct1.635_Rev         | GCCGTCGACTCAGAATTTACAAATTCT  |
| ct2.154_Fwd         | GCCACTAGTATGTTTGCAGAGACCGAG  |
| ct2.154_Rev         | GCCGTCGACTCACGAGTTGTCAGCACA  |
| ct3.891_Fwd         | GCCACTAGTATGACATCTGATGAGAAT  |
| ct3.891_Rev         | CCGTCGACTCAATTCCTTTCACTGTT   |
| ct4.270_Fwd         | GCCACTAGTATGAAATTCTCCCTCTCT  |
| ct4.270_Rev         | GCCGTCGACTTAACCGTGTAAGTTGC   |
| ct8.044_fwd         | GCCACTAGTATGAAGTTCTCCCATTCG  |
| ct8.044_rev         | GCCCTCGAGTCACATCCCTGTTAATCT  |
| ct9.7765_fwd        | GCCACTAGTATGTCGACCTCTTCTCTC  |
| ct9.7765_rev        | GCCGAATTCCTAAACTCTTGGTGCATG  |

**Table S3.** Parameters obtained with HHPred for 3D-model construction.

| Protein templates | PDB Hit | Organism                  | E-value      | Similarity | Identity | Score | Probability (%) |
|-------------------|---------|---------------------------|--------------|------------|----------|-------|-----------------|
| <b>ScAto1</b>     | 5YS3    | <i>Citrobacter koseri</i> | $3.7e^{-32}$ | 0.566      | 35%      | 236.5 | 100.0           |
| <b>EcSatP</b>     | 5YS3    | <i>Citrobacter koseri</i> | $1.5e^{-36}$ | 1.498      | 92%      | 235.4 | 100.0           |
| <b>CjAto2</b>     | 5YS3    | <i>Citrobacter koseri</i> | $6.7e^{-33}$ | 0.538      | 32%      | 237.2 | 100.0           |
| <b>CjAto5</b>     | 5YS3    | <i>Citrobacter koseri</i> | $7e^{-35}$   | 0.525      | 26%      | 252.0 | 100.0           |

**Table S4.** Residues of Ato homologs presenting strong intramolecular interactions with lactate, succinate and citrate identified by molecular docking studies.

| 3D-Protein templates | Lactate                                              | Succinate                                                                       |                                                     | Citrate                                                   |
|----------------------|------------------------------------------------------|---------------------------------------------------------------------------------|-----------------------------------------------------|-----------------------------------------------------------|
|                      | (-1)                                                 | (-1)                                                                            | (-2)                                                | (-3)                                                      |
| <b>ScATO1</b>        | R111; T238; N179; T222; T102; S106; E140; T209; N255 | T238; N179; R111; T222; T102; Q133; S208; N145; N255; T209; E140                | R111; N179; T238; T222; T209; S208; N145            | N255; T209; S208; N89; N145; Q133; T238; H230; R111; N179 |
| <b>CjATO2</b>        | K244; S189; N127; N91; T203; I97; T99; Y158          | N236; K244; S189; C185; T203; N91; T84; T99; D150; R214; Q219; S211; W144; Y158 | S189; K244; N127; T203; W144; T99; Q219; R214; Y158 | ND                                                        |
| <b>CjATO5</b>        | N101; G220; Q103; T229; K230                         | E125; K221                                                                      | K221                                                | N137; S199; K198; N81; K221; Q103; T229; K230; G220       |

Note: ND - not determined.

**Table S5.** Average of the binding affinity values [kcal/mol] calculated with PyRx software for the docking of Ato proteins with the distinct charged substrates tested.

| 3D-Protein templates | Average of binding affinities (kcal/mol) at different binding sites |      |      |      |      |      |      |
|----------------------|---------------------------------------------------------------------|------|------|------|------|------|------|
|                      | Lactate (-1)                                                        |      |      |      |      |      |      |
|                      | S4                                                                  |      |      | S3   | S2   | S1   |      |
|                      | a                                                                   | b    | c    |      |      | a    | b    |
| <b>ScAto1</b>        | -                                                                   | -3.8 | -    | -4.1 | -3.9 | -3.3 | -3.1 |
| <b>EcSatP</b>        | -3                                                                  | -    | -    | -3.6 | -3.8 | -3   | -    |
| <b>CjAto2</b>        | -3.4                                                                | -    | -3.4 | -4.2 | -2.6 | -3.4 | -3.1 |
| <b>CjAto5</b>        | -3.2                                                                | -3.1 | -    | -3.3 | -3.8 | -3.4 | -    |
|                      | Succinate (-1)                                                      |      |      |      |      |      |      |
|                      | S4                                                                  |      |      | S3   | S2   | S1   |      |
|                      | a                                                                   | b    | c    |      |      | a    | b    |
| <b>ScAto1</b>        | -                                                                   | -4.0 | -    | -5   | -4.5 | -3.9 | -3.8 |

|        |                |      |      |      |      |      |      |
|--------|----------------|------|------|------|------|------|------|
| EcSatP | -3.6           | -    | -    | -4.5 | -4.6 | -4.2 | -    |
| CjAto2 | -4.2           | -    | -4.2 | -4.7 | -3.2 | -3.9 | -4   |
| CjAto5 | -3.8           | -    | -    | -3.9 | -4.7 | -    | -    |
|        | Succinate (-2) |      |      |      |      |      |      |
|        | S4             |      |      | S3   | S2   | S1   |      |
|        | a              | b    | c    |      |      | a    | b    |
| ScAto1 | -              | -4.0 | -    | -5   | -4.4 | -3.7 | -    |
| EcSatP | -3.4           | -    | -    | -4.4 | -4.7 | -4.3 | -    |
| CjAto2 | -4             | -    | -4.1 | -4.8 | -3.1 | -4.1 | -4   |
| CjAto5 | -3.8           | -    | -    | -3.9 | -4.6 | -    | -    |
|        | Citrate (-3)   |      |      |      |      |      |      |
|        | S4             |      |      | S3   | S2   | S1   |      |
|        | a              | b    | c    |      |      | a    | b    |
| ScAto1 | -              | -5.0 | -    | -6.1 | -3.7 | -4.6 | -    |
| EcSatP | -4.2           | -    | -    | -5   | -4.3 | -4.2 | -    |
| CjAto5 | -4             | -4   | -    | -3.5 | -5.5 | -4.5 | -4.2 |

**Figure S1.** Multiple sequence alignment of Ato homologs from *Saccharomyces cerevisiae* (Ato1, Ato2, Ato3), *C. jadinii* (CjAto1-5) and the *Escherichia coli* SatP. The sequence alignment was built with ClustalOmega (<https://www.ebi.ac.uk/Tools/msa/clustalo/>). Localization of transmembrane segments (TMSs) was predicted by the PSI/TM-Coffee software (<http://tcoffee.crg.cat/apps/tcoffee/do:tmcoffee>). Grey background highlights the previously identified and characterized signature motifs of the AceTr family (Ribas et al., 2019). Blue rectangles indicate residues from the narrowest hydrophobic constriction site F98-Y155-L219 (refer to ScAto1p) (Qiu et al., 2018).

1<sup>st</sup>TMS

ScAto1 GRQKFLKSDLYQAFG-GTLNPGLAP-APVHKFANPAPLGLSAFALTTFVLMSFNARAQGI 115

ScAto2 GRQKFLRDDLFEAFG-GTLNPGLAP-APVHKFANPAPLGLSGFALTTFVLMSFNARAQGI 114

ScAto3 GSSTYRRRDLNLALDRGDGEEGNCAKYTPHQFANPVPGLGLASFSLSCVLVSLINANVRGV 112

CjAto1 GRTKVLRLSELWNAFG-GDLQPGIHA-PPPRRFANPAPLGLCGFALTTFVLMSNARAMGI 110

CjAto2 GRMKVRKSELWSAFG-GDLQPGVHA-QPQRKFANPVPGLCGFALTTLVLMSANARAMGI 97

CjAto3 GRTKVLRLSELWNAFG-GDLQPGIHA-TPPRRFANPAPLGLCAFALTTFVLMSVNARAMGI 104

CjAto4 GHQKVLRLSELWTAFG-GDLQPGVHA-PPQRLANPAPLGLCGFALTTFVLMSANARAMGV 106

CjAto5 GNQAFSKKDLFNAFA-GDLQPGLHA-TPHRPMGNPVPMLGTSFCICCFVSVLVNAQARGV 107

EcSatp -----MGNTKLANPAPLGLMGFSMTTILLNLHNVGYFA- 33

2<sup>nd</sup>TMS 3<sup>rd</sup>TMS

ScAto1 TVPNVVVGCAMFYGGLVQLIAGIWEIALENTFGGTALCSYGGFWLSFAAIYI-PWFGILE 174

ScAto2 TIPNVVVGCAMFYGGLVQLIAGIWEIALENTFGGTALCSFGGFWLSFGAIYI-PWFGILD 173

ScAto3 TDGKWALSFLMFFGGAIELFAGLLCFVIGDTYAMTVFSSFGGFWICYGYGLT-DTDNLVS 171

CjAto1 TVANVAVGPAFFYGGIIQLLSGMWEISLDNTFGGTVLSSYGGFWLSWAAIQI-DWFGIQR 169

CjAto2 RTPNVAVAPAFFYGGFAQILAGMWEIALENTFGSVVLTSYGCFWLSWAAIEI-DWFGIKA 156

CjAto3 TTPNIVVGLALFYGGFVQLLAGMWEIALDNTFGGTALSSYGGFWMSYAAIQI-DWFGIKS 163

CjAto4 TIPNAAVGAACFYGGLVQLLAGMWEISLDNTFGGTALSSYGGFWMSWAAIQI-DWFGIKK 165

CjAto5 TNAKVIASCALFFAGVVETISGLWCLVIENTFAATALGSFGGFWMGYAGLLI-DAFGITS 166

EcSatp -LDGIILAMGIFYGGIAQIFAGLLEYKKGNTEFGLTAFTSYGSFWLTLVAILLMPKLGLED 92

4<sup>th</sup>TMS 5<sup>th</sup>TMS

ScAto1 AYEDNESDLNNALGFYLLGWAIFFTGLTVCTMKSTVMFFLLFFILLALTFLLLSIGHFANR 234

ScAto2 AYKDKESDLGNALGFYLLGWALFTFGLSVCTMKSTIMFFALFFILLAVTFLLLSIANFTGE 233

ScAto3 GYTDP-TMLNNVIGFFLAGWTVFTFLMLMCTLKSTWGLFLLLTFLDLTFLLLCIGTFIDN 230

CjAto1 AYDDP-IMLNNGLGFLLGWVIFTLMVLICTVKSTVAFFSLFFFELEMTFLLLTIGEFTRS 228

CjAto2 AYDDP-IELENAIGFLLGWVIFTFLILLCTMKSTVAFFSMFFILEITFILLTVASFTRH 215

CjAto3 AYTDP-IELANAVSFFLLGWTIFTFMILLCTVKSTVSFFSLFFFELEITFLLLTIGDFTRR 222

CjAto4 AYDDP-IMLANAVGFLLGWTIFTFMVLVLCCTVKSTVAFFSLFFFLDITFLLLTIGEFTRK 224

CjAto5 SYSTT-EELGNALGFYLTAWTIFAFLMWLCTFKSTWPFFILFLIVVFLMCLAIGKYNDN 225

EcSatp A-----PNAQFLGVYLGWGVFTLFMFFGTLKGARVLQVFVFSLTVLVALLAIGNIAGN 146

6<sup>th</sup>TMS

ScAto1 LGVTRAGGVLGVVAFIAWYNAYAGVATKQNSYVLARFPFLPSTERVIF--- 283

ScAto2 VGVTRAGGVLGVIVAFIAWYNAYAGIATRQNSYIMVHPFALPSNDKVFF--- 282

ScAto3>NNLKMAGGYFGILSSCCGWYSLYCSVSVSPNSYLAFAHTMPNAP----- 275

CjAto1 VGVTRAAGVFGVITSFLGWYNALAGFATRENSYFVATAVPLPGAKRAQVHS- 279

CjAto2 VGCQRAGGVFGVITGFLAWYNAYAGIATKEISYFVPKPWPLPGASHL----- 262

CjAto3 VGVTRAGGVFGVITAFIAWYNAFAGIATKENSYITIKAWPLPGAKRA----- 269

CjAto4 TGVSRAAGVFGVITSFIAWYNAFAGLATKENSYVVAIPLPLPGAKRS----- 271

CjAto5 TTATKAGGVFLGVATFVGFFIVYAGVADSSNSYLTIPASPMPHAPRV----- 272

EcSatp AAIHFAGWIGLICGASAIYLAMGEVLNEQFGRTVL---PIGESH----- 188

**Figure S2.** Molecular docking of *Escherichia coli* Satp 3D-model, based on SatP\_Ck structure, with the substrates lactate (blue ligand), succinate (orange ligand) and citrate (green ligand). The four binding sites are depicted from S1 to S4 sites, including the localization of N- and C-terminal of the protein. The narrowest hydrophobic constriction of the anion pathway formed by F17, Y72 and L131 is also represented.

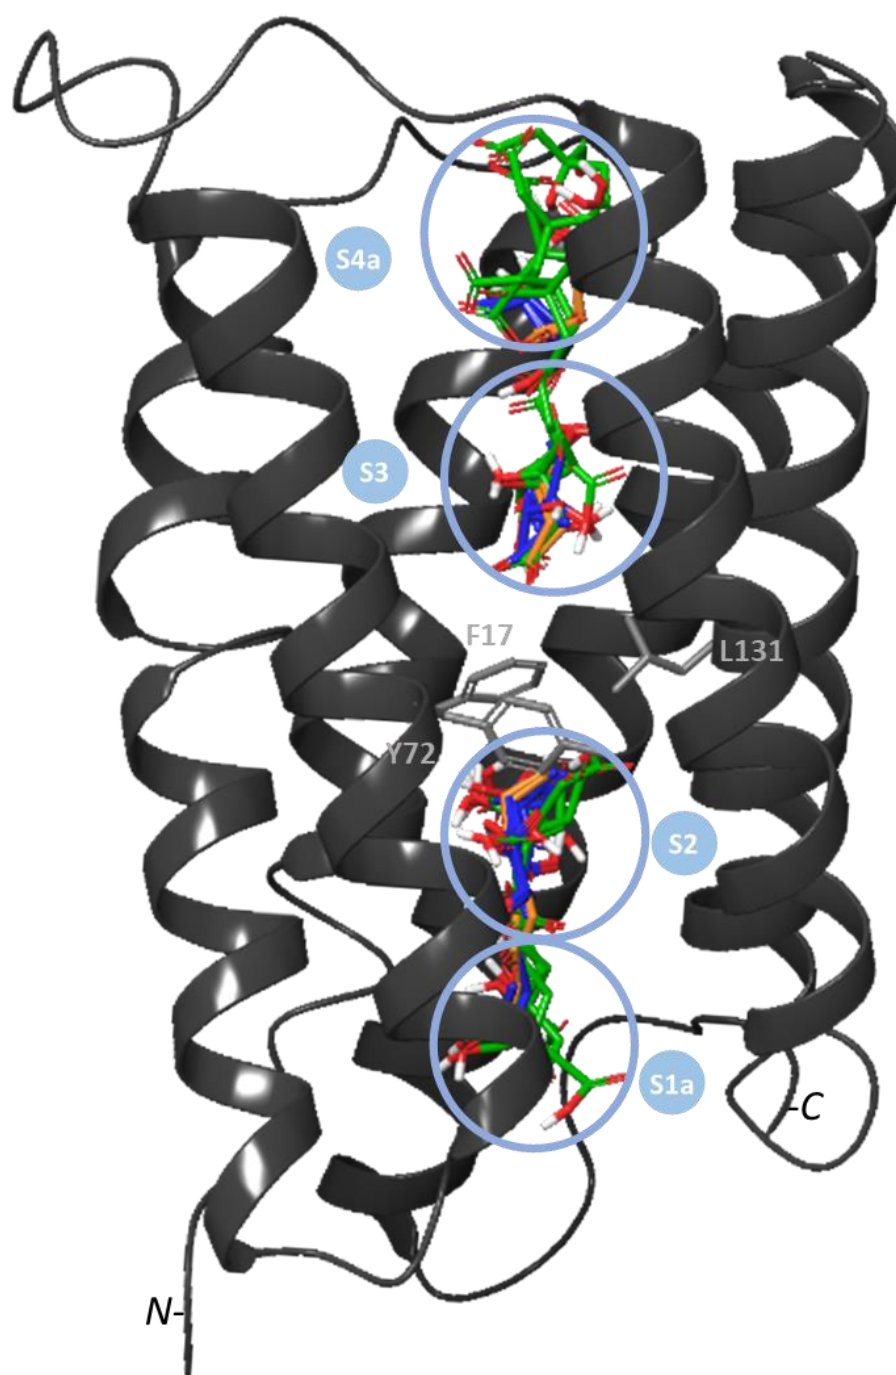



**Figure S3.** Predicted 3D structures of Ato proteins visualized with Maestro and HOLE softwares. On the left are the pore predictions: blue (larger aperture), green (intermediate pore size) and red (constricted pore). The top view of the narrowest hydrophobic constriction site of the anion pathway is also presented, including the predicted distances (Å) between represented residues.

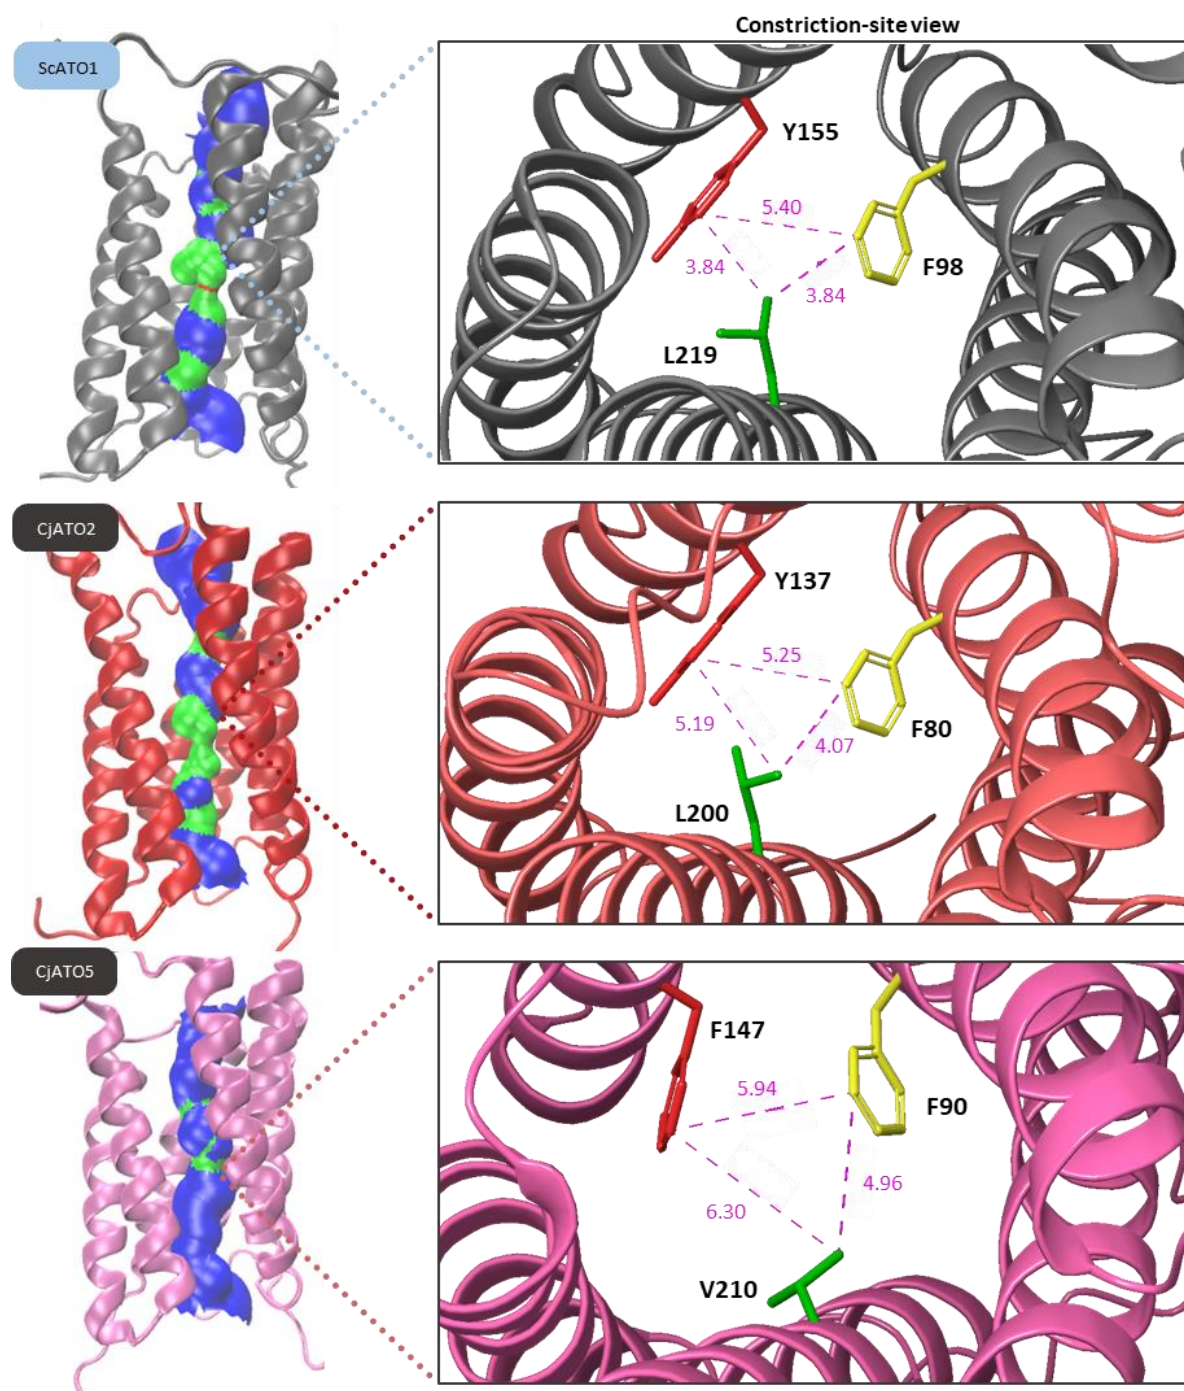



**Figure S4.** Multiple sequence alignment of Jen homologs from *Saccharomyces cerevisiae*, *Candida albicans* (CaJen1-2), *Cluyveromyces lactis* (KlJen1-2) and *C. jadinii* (CjJen1-6). The sequence alignment was built with ClustalOmega (<https://www.ebi.ac.uk/Tools/msa/clustalo/>) and the localization of transmembrane segments (TMSs) predicted by the PSI/TM-Coffee (<http://tcoffee.crg.cat/apps/tcoffee/do:tmcoffee>). Grey background highlights the previously identified and characterized motifs of the SHS family for carboxylate transporter affinity (Soares-Silva et al., 2007; 2011).

| 1 <sup>st</sup> TMS         |                                                                 |                                         |        |                                                                |                                                             |     |
|-----------------------------|-----------------------------------------------------------------|-----------------------------------------|--------|----------------------------------------------------------------|-------------------------------------------------------------|-----|
| ScJen1                      | ALTRFTSLLHIEF----                                               | SWENVNPIELRKMTWQNNWYFMGYFAWLAAWAFFFCVSV | 161    | ScJen1                                                         | FLPILLIFWRLWPETKYFTKVLKARKLILSD---AVKANGGEPLPK--ANFKQKMVSMK | 358 |
| CaJen1                      | FATRLTLLDPLHYTHKKWYEVINPIGLKSMKSDWNWYFLGFAWALDAMDFFFCVSV        | 112                                     | CaJen1 | GLSLILIVWRLFTPESPDYIKMKIKKEKFNQQRKLEQEONGGVAVKEKFWQIKDISIL     | 316                                                         |     |
| CaJen2                      | AITRVTSWVGWDELKQYSWHEVLNPFEPVEMNLHQWNNFFFLGFAWATWDALDFFVFTSL    | 95                                      | CaJen2 | GPPILIIWRFINPETSQYRQKERFDQGAQV---K-----NSKAAEFKS----QAK        | 282                                                         |     |
| KlJen1                      | AITRFTTTELHHRV-----SMENINPIELRKMTLHNWNYFMGYAAWLCAWAFFFAVSV      | 154                                     | KlJen1 | WLPVALLIWLRLVWPETKYFTKVLKARQIMRDD----AIKNGGQPLPK--LSFKQKFAVNVK | 352                                                         |     |
| KlJen2                      | LATRIPTLFPFKASIREARKEYPINFPFALRSMNWLQTYQFIVGFLAWTWDALDFFAVSL    | 100                                     | KlJen2 | GPPVLFIARWLMLPESQHYVERVRLEKL-----E-----NDGKSQFWK----NAK        | 302                                                         |     |
| CjJen1                      | SKTRFTSLTHLHLH-----AVGDLNPLPSLRMSWNNWNFFFMGFVAWFSASFDFFLTAV     | 94                                      | CjJen1 | CFFPFLICWRLVFPETRYFTRVLKARELIKQD---QIEAGV---YVK--PTLTKWGSVK    | 287                                                         |     |
| CjJen2                      | SRTRFTTLGELHLD-----SLSDLNPLPALKEMTPRNWNFFFMGFIAWFSASFAFLTAV     | 111                                     | CjJen2 | GIPFVLIWRLYLPETTYFTFTRVLKVKKLKEE---AST-----SPKISKWAKTK         | 289                                                         |     |
| CjJen3                      | ILSRVPTLFCIPGT-----SFQALNPVPALSALSRDNWNYFLMGYAAWTIDAFDFFCVSA    | 64                                      | CjJen3 | APPAILFVWRMFFPEHPHFTALKRVQREKAL-----AST---SEGKHQAASPEWQFFADLK  | 273                                                         |     |
| CjJen4                      | IATRIPSLFTLPGT-----PVKSLNPAPAMRALSRSDWNYFMGYCAWVIDAFDFFCVSA     | 61                                      | CjJen4 | APPAILFMWRLMFPPEHPHFTVEHKRVQREKAL-----AEGNHAQAASPEWQFFYDLK     | 253                                                         |     |
| CjJen5                      | -----MDWDAFDFVFMVSL                                             | 13                                      | CjJen5 | GPPKL-----KPFLLQQLLHM-----KNKNTSFSE---DAC                      | 182                                                         |     |
| CjJen6                      | TRERFTLLPSREQWE--VEKSHMNPFPGRLAMTWRNQWYFIIGMLAWTWDALDFFFAMSL    | 72                                      | CjJen6 | GPPVLFIWRAFLPETEEFLQQLKLM-----SNRKSFTFR---DAW                  | 252                                                         |     |
| : ** :                      |                                                                 |                                         |        |                                                                |                                                             |     |
| 2 <sup>nd</sup> TMS         |                                                                 |                                         |        |                                                                |                                                             |     |
| ScJen1                      | SVAPLAELYDRPKDITWGLGLVLFVR-----SAGAVIFGLWTDKSSR                 | 204                                     | ScJen1 | RTVQKYWLLFAYLVLLVGVNYLTHASQDLLPTMLRAQLGLSKDAVTIVVVNTIGATCG     | 418                                                         |     |
| CaJen1                      | AAPEIANTLNI SVTDVTWGTVLVLMIR-----SAGAVIFGIADSYFGR               | 155                                     | CaJen1 | VTFKTEWLLIFS YLVLLYAGWNFTTHGSQDLYVTMITKYVHVLGDKKTVIIVVSNIGGIIG | 376                                                         |     |
| CaJen2                      | NVSNIAEDLDSTVKDWSWGITLVLMIR-----TVGALIFGAIGDTYGR                | 138                                     | CaJen2 | KALNQYWLIIIVYLIFLMAGNFSSSHGSQDLYPTMLTKQYHYGKDKSTVVNVCANLALAG   | 342                                                         |     |
| KlJen1                      | SKTFLATLYGKETKDIDWGLSLVLFVR-----SAGAIIFGIWTDNYSR                | 197                                     | KlJen1 | KTVSKYWLLFGYLLILLVGVNYLTHASQDLFPMLRAQLRFSEDAVTVAIVVCLGSITAG    | 412                                                         |     |
| KlJen2                      | NMTNLAKDLDRPVKDISHAITLVLLLR-----VIGALIFGYLDTRYGR                | 143                                     | KlJen2 | LACSQYWLMSIYLVLIMAGNFSSSHGSQDLYPTMLTSQYQFSADASTVNSVANLGAITAG   | 362                                                         |     |
| CjJen1                      | SGTYIAQSLDVSTADITWGLSAVLMVR-----SAGAVIFGLWTDNYSR                | 137                                     | CjJen1 | AMLKKDWLLFTYLVLLLAGNYLTHASQDMYPTMLRSQLEWSDAQTVIAIVVNLGATCG     | 347                                                         |     |
| CjJen2                      | SGTVIAESLEVSTKIDITWGLSSVLMVR-----SAGAVIFGLWTDNYSR               | 154                                     | CjJen2 | TMFSKYWLLFTYLVLLLAGSNFLTHASQDMYPTMLRSQFGWSDAQTVIAIVVNLGGVIG    | 349                                                         |     |
| CjJen3                      | CAPALAQALDRSVDITWGITVLVMTREYFAHIDQQLTDIFEISGLGAVIFGSLSDTYGR     | 124                                     | CjJen3 | SAMRHHLMFVYLVLYMSLMNFS SHASQDLMPTMLQNLGFEANDRTIIMVVINIGATFG    | 333                                                         |     |
| CjJen4                      | CAPALAKAFDRSIHDITWGITVLVMTREYFAHIDQQLTDIFEISGLGAVIFGSLSDTYGR    | 104                                     | CjJen4 | KALSNHLMFVYLVLYMSLMNFS SHASQDLMPTMLQNLGFFSANQRTAIMVNLGAMVG     | 313                                                         |     |
| CjJen5                      | NVSKLATDLDRSVKDISWGITVLVMTREYFAHIDQQLTDIFEISGLGAVIFGSLSDTYGR    | 56                                      | CjJen5 | KVFKEQWLKMIYLVLIMAGNFMSSHGSQDLYPTMLTVQLNYSNPRSTVTNSVANLALAG    | 242                                                         |     |
| CjJen6                      | NMSNISLDRSVKDVSWGITVLVMTREYFAHIDQQLTDIFEISGLGAVIFGSLSDTYGR      | 115                                     | CjJen6 | NTFKQQWKMGLVLLIMAGNFMSSHGSQDLYPTMLTKQLGFSRDRSTVTNSVANLALAG     | 312                                                         |     |
| * : : * : : *               |                                                                 |                                         |        |                                                                |                                                             |     |
| 3 <sup>rd</sup> TMS         |                                                                 | 4 <sup>th</sup> TMS                     |        | 5 <sup>th</sup> TMS                                            |                                                             |     |
| ScJen1                      | KWPYITCLFLFVIAQLCTPWCDTYEKFLGVRWITGIAMG-----GI                  | 245                                     | ScJen1 | GMIFGQFMEVTGRRRLGLLIAC TMGGCTYPAFMLRSEKAILGAGFMYFCVGVWGVLPI    | 478                                                         |     |
| CaJen1                      | KWTYISIVTLFVVVEVGTFGVQYQQLGVRAIFGILMG-----AM                    | 196                                     | CaJen1 | GIIMGQASELLGRRLTVVISI VCAGAFLYPSFFNPD--RNWPAYI FLNAFVGSF SVGPA | 434                                                         |     |
| CaJen2                      | KWPYIINLSCLMVIGITGVFTYFQQFLGLRALFGVAMG-----GL                   | 179                                     | CaJen2 | GIVIAHLSTFIRGRTALLGNVIAGIMIFYWAFHP---MMITAFMQFGQGSWSVVP I      | 398                                                         |     |
| KlJen1                      | KWPYITCLGLFLICQLCTPWAKTYTQFLGVRWISGIAMG-----GI                  | 238                                     | KlJen1 | GMFFGQMLEITGRRVGLLLALIMAGCTYPAFMLKTS SSVLGA GFMLWFSILGVWGVLPI  | 472                                                         |     |
| KlJen2                      | KYSFVLTMALIIVIGITGVFNVSFAFLGCRAIFGIIMGSVFGSAFLGCRAIFXIMGSV      | 203                                     | KlJen2 | GIIVAHASSFFGRFRFSII VCCIGGGAMLYPWGFWANKSGINAVFLQFVQGAWGVIPI    | 422                                                         |     |
| CjJen1                      | KWPFITTAAMFCALQIGTGFCCKTYQCFMAVRAISGIAMG-----GT                 | 178                                     | CjJen1 | GLIAGTFMEVTGRRLLAILICCVIGGCFVYPA YMMHNSAVLGGGFLFFAIVGVWGVLPI   | 407                                                         |     |
| CjJen2                      | KWPFITATAAMFCVLQIGTGFCNTYTYQFL-----AG-----GT                    | 186                                     | CjJen2 | SLVTGIVMEVLGRRLSILLCCVIGGSFIYPAIMLHTTSATLGC GGFMMFVLGVWGVIPI   | 409                                                         |     |
| CjJen3                      | KPTYLAVMCLFCIEVGTGFVNQYQFLVVRAMFGICMG-----GC                    | 165                                     | CjJen3 | GLCVGTISEYTGRRLLAVFVCTICSSALIIYPAFYTTDMAGLICGGFFMQFVVMGCWGVTSV | 393                                                         |     |
| CjJen4                      | KPTYLAVMALFSIIIEIGTGFGVQNYTQFLIVRLFGICMG-----GC                 | 145                                     | CjJen4 | GLCVGTISEFTGRRLLAFSCAVGSSALIIYPAFFSTSI GGLMAGGFMQFVVMGCWGVTSV  | 373                                                         |     |
| CjJen5                      | KWPLIVNLFCLVVIQIGTGFINTYAEFIVGRALFGVFMG-----SM                  | 97                                      | CjJen5 | GMTFGHFGSGLGRRSGIIIC SILGACMIYPWAFVRN--SGINAGVFFLQFVQGAWGVIPI  | 301                                                         |     |
| CjJen6                      | KWPLIVNLCILVIGITGVFTKYSEFLGVRALFGIFMG-----SM                    | 156                                     | CjJen6 | GMVIGHFGSGFIRRAAIMVCCICGGAMIYPWAFVTG--NGINAGVFFLQFVQGAWGVIPI   | 371                                                         |     |
| * : : * : : *               |                                                                 |                                         |        |                                                                |                                                             |     |
| 3 <sup>rd</sup> TMS         |                                                                 | 4 <sup>th</sup> TMS                     |        | 5 <sup>th</sup> TMS                                            |                                                             |     |
| ScJen1                      | KWPYITCLFLFVIAQLCTPWCDTYEKFLGVRWITGIAMG-----GI                  | 245                                     | ScJen1 | GMIFGQFMEVTGRRRLGLLIAC TMGGCTYPAFMLRSEKAILGAGFMYFCVGVWGVLPI    | 478                                                         |     |
| CaJen1                      | KWTYISIVTLFVVVEVGTFGVQYQQLGVRAIFGILMG-----AM                    | 196                                     | CaJen1 | GIIMGQASELLGRRLTVVISI VCAGAFLYPSFFNPD--RNWPAYI FLNAFVGSF SVGPA | 434                                                         |     |
| CaJen2                      | KWPYIINLSCLMVIGITGVFTYFQQFLGLRALFGVAMG-----GL                   | 179                                     | CaJen2 | GIVIAHLSTFIRGRTALLGNVIAGIMIFYWAFHP---MMITAFMQFGQGSWSVVP I      | 398                                                         |     |
| KlJen1                      | KWPYITCLGLFLICQLCTPWAKTYTQFLGVRWISGIAMG-----GI                  | 238                                     | KlJen1 | GMFFGQMLEITGRRVGLLLALIMAGCTYPAFMLKTS SSVLGA GFMLWFSILGVWGVLPI  | 472                                                         |     |
| KlJen2                      | KYSFVLTMALIIVIGITGVFNVSFAFLGCRAIFGIIMGSVFGSAFLGCRAIFXIMGSV      | 203                                     | KlJen2 | GIIVAHASSFFGRFRFSII VCCIGGGAMLYPWGFWANKSGINAVFLQFVQGAWGVIPI    | 422                                                         |     |
| CjJen1                      | KWPFITTAAMFCALQIGTGFCCKTYQCFMAVRAISGIAMG-----GT                 | 178                                     | CjJen1 | GLIAGTFMEVTGRRLLAILICCVIGGCFVYPA YMMHNSAVLGGGFLFFAIVGVWGVLPI   | 407                                                         |     |
| CjJen2                      | KWPFITATAAMFCVLQIGTGFCNTYTYQFL-----AG-----GT                    | 186                                     | CjJen2 | SLVTGIVMEVLGRRLSILLCCVIGGSFIYPAIMLHTTSATLGC GGFMMFVLGVWGVIPI   | 409                                                         |     |
| CjJen3                      | KPTYLAVMCLFCIEVGTGFVNQYQFLVVRAMFGICMG-----GC                    | 165                                     | CjJen3 | GLCVGTISEYTGRRLLAVFVCTICSSALIIYPAFYTTDMAGLICGGFFMQFVVMGCWGVTSV | 393                                                         |     |
| CjJen4                      | KPTYLAVMALFSIIIEIGTGFGVQNYTQFLIVRLFGICMG-----GC                 | 145                                     | CjJen4 | GLCVGTISEFTGRRLLAFSCAVGSSALIIYPAFFSTSI GGLMAGGFMQFVVMGCWGVTSV  | 373                                                         |     |
| CjJen5                      | KWPLIVNLFCLVVIQIGTGFINTYAEFIVGRALFGVFMG-----SM                  | 97                                      | CjJen5 | GMTFGHFGSGLGRRSGIIIC SILGACMIYPWAFVRN--SGINAGVFFLQFVQGAWGVIPI  | 301                                                         |     |
| CjJen6                      | KWPLIVNLCILVIGITGVFTKYSEFLGVRALFGIFMG-----SM                    | 156                                     | CjJen6 | GMVIGHFGSGFIRRAAIMVCCICGGAMIYPWAFVTG--NGINAGVFFLQFVQGAWGVIPI   | 371                                                         |     |
| * : : * : : *               |                                                                 |                                         |        |                                                                |                                                             |     |
| 5 <sup>th</sup> TMS         |                                                                 | 6 <sup>th</sup> TMS                     |        | 7 <sup>th</sup> TMS                                            |                                                             |     |
| ScJen1                      | YGCASATAIEDAPVKARSFSLGFLFFSAYAMGFI FAIFYRAFGYF--RDDGKWLFWFSI    | 303                                     | ScJen1 | HIAELAPADARALVAGLSYQLGNLASAASSTIETQLADRYPLERD--ASGAVIKEDYAKVM  | 537                                                         |     |
| CaJen1                      | YPIAMVTALEGQPIAARSVLISGLFLPGYCFGYIMAMVYRAFAGTYKEGEGWRS LWFWSG   | 256                                     | CaJen1 | YLELVNSTHRTLGLSGVAYQLGNLVSSASSTIEAKIGERFPLKQD----PGMFDYKVM     | 489                                                         |     |
| CaJen2                      | FGICAAEALGDAPKARGVLSIGIFQEGYAFGYLLAVVFQRAIADTT--EKTWRSEVWFSA    | 237                                     | CaJen2 | HLSELSPPHFRSFGVSVYQLGNLVSSASSTIEATIEE-----QIHIDYKTM            | 445                                                         |     |
| KlJen1                      | YACASATAIEDAPVKARSFSLGFLFFSAYAMGFI FAIFYRAFGLVNN--GENYKWLQVWFSI | 297                                     | KlJen1 | HLSELSPPEARALVSGLAYQLGNLASAASVVIENDLADLYPIEWN--SAVKVTNKDYKVM   | 531                                                         |     |
| KlJen2                      | FGVASXTALENAPNKAISILSGIFQEGYAFGXLLGVVFQRAIVDNS--PHGWRAIFWFS     | 261                                     | KlJen2 | HLTELAPTEFRALITGVAYQLGNMISASSTIEASIGERFPLE----GREDAYDYKVM      | 477                                                         |     |
| CjJen1                      | YATAAATSMDDAPLKARSFSLGFLFFSAYAFGMI FAATFWRAFES--TKHSWKALFWFS    | 235                                     | CjJen1 | HLSELSPDARALVSGLAYQLGNLASSASSTIETRLAKWPLEWD--AEGNPKIDYAKTI     | 466                                                         |     |
| CjJen2                      | YATAAATSLDAPLKARSFSLGFLFFSAYAFGMI FAATFWRAFES--THWTWALFWFS      | 243                                     | CjJen2 | HLSELSPDARALVSGLAYQLGNLASSASSTIETDLAQRWPLEWD--AEGNPKIDYAKTI    | 468                                                         |     |
| CjJen3                      | YTTASATALESQPVGSRVLSIGIFLPGYNLGYILAVAFYRAFES--EHGWRALFWFS       | 222                                     | CjJen3 | YIMELSPNAPRALFGGLAYQLGNLASSASSTIEAEISEAFPLSDI----GPEVVDYARM    | 449                                                         |     |
| CjJen4                      | YTTASATALESQPTTSRVLGIGIFLPGYNLGYILAVAFYRAFES--THGWRALFWFS       | 202                                     | CjJen4 | YIMELSPNAPRALFGGLAYQLGNLASSASSTIEAEISEAFPLSDI----GPEVVDYARM    | 429                                                         |     |
| CjJen5                      | YGLASATAMEGLPTSARSFSLGVYQGYALGYLLGVVFQRAITDIT--THTWRS LWFWSA    | 155                                     | CjJen5 | HLSELSPPEFRAFVGVSVYQLGNLASSASSTIESTLGERYPDYDDNGDIEGVYDYARM     | 361                                                         |     |
| CjJen6                      | YGLASATALEGLPTDARSFSLGVYQGYALGYLLAVIFQRAITDIT--EKGWRS LWFWSA    | 214                                     | CjJen6 | HLSELSPPEFRAFVGVSVYQLGNLASSASSTIETTIGERFPLYTETGERREGVYDYARM    | 431                                                         |     |
| : . : . * : . * : . * : . * |                                                                 |                                         |        |                                                                |                                                             |     |



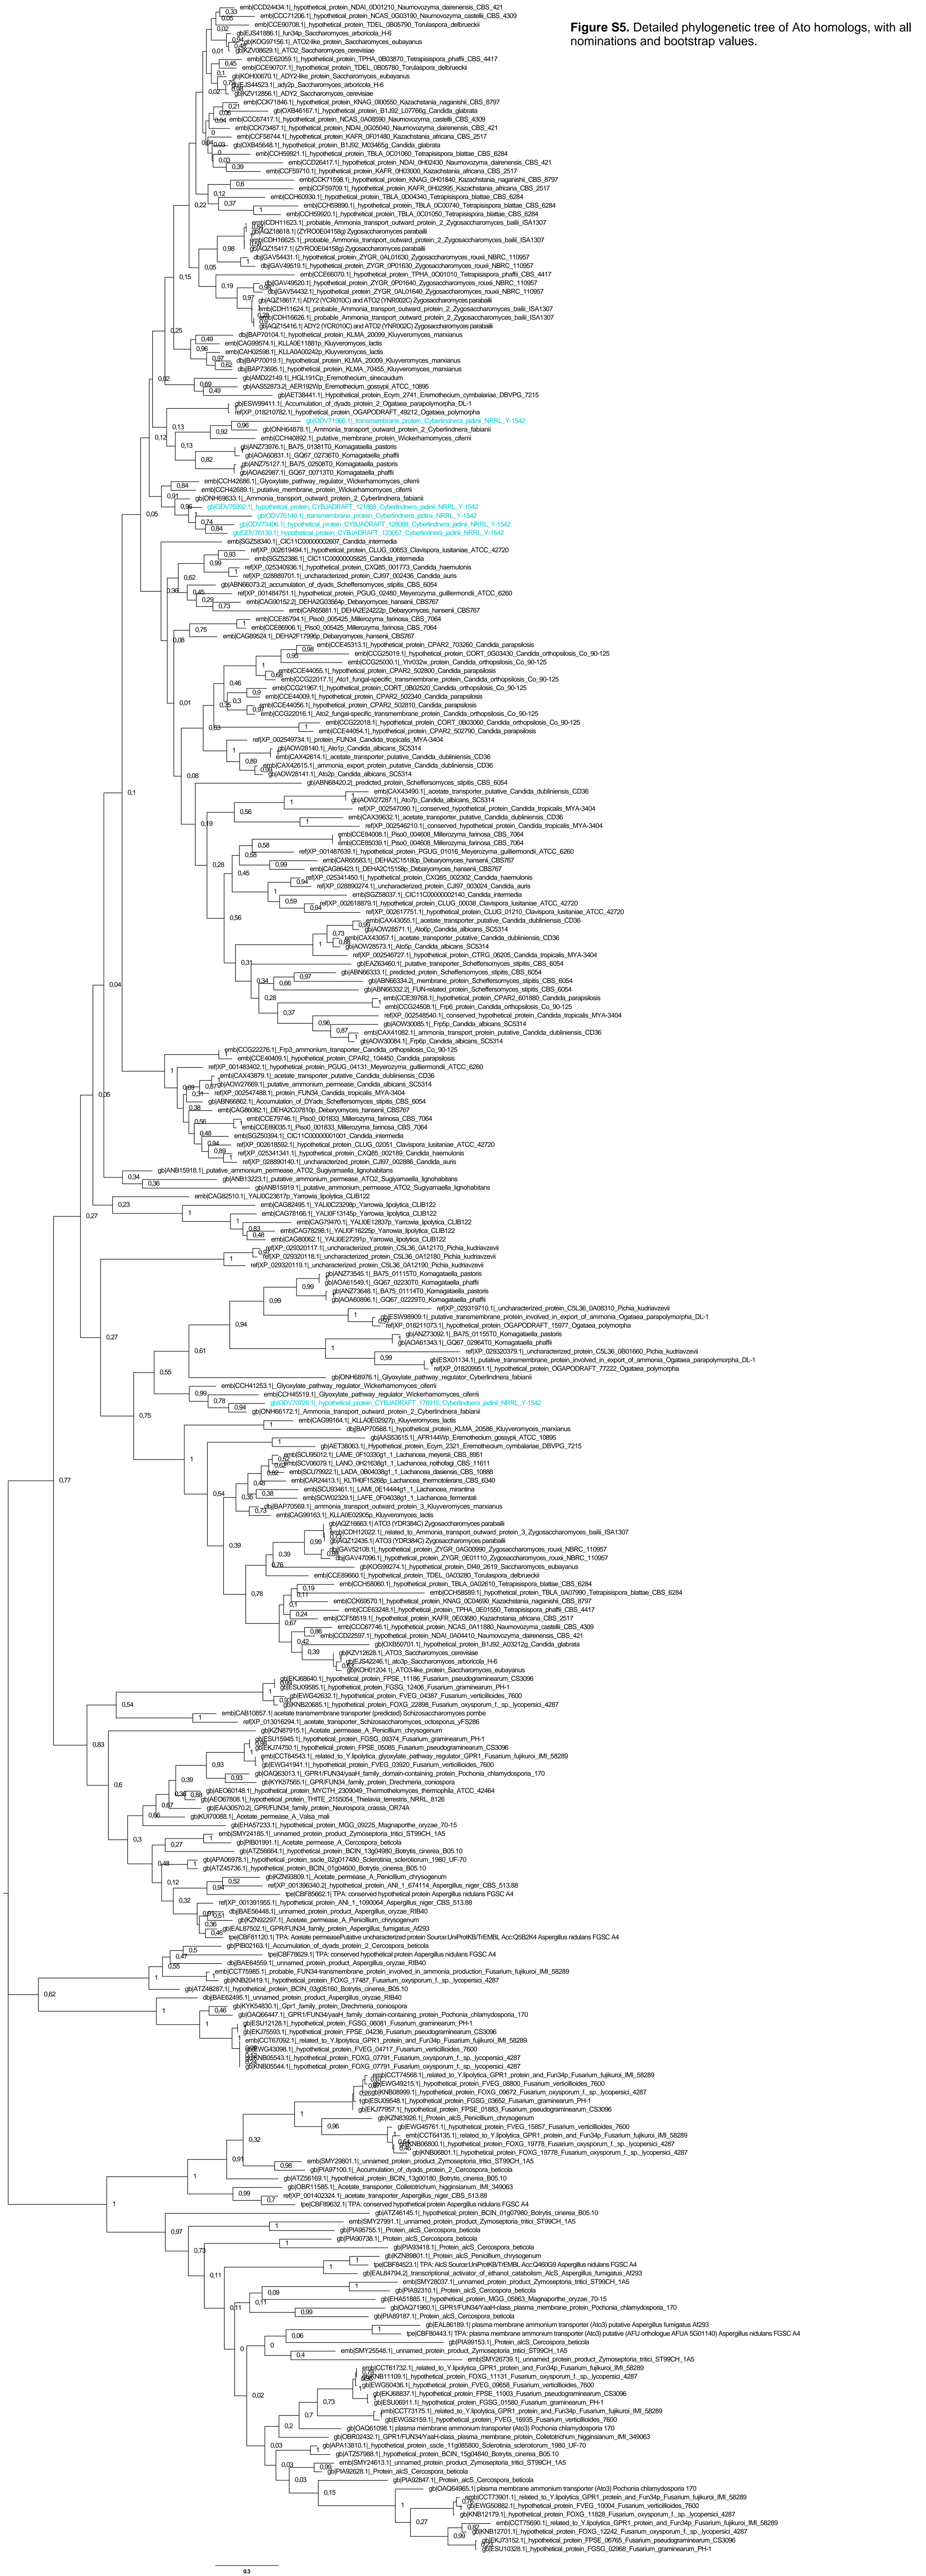



Figure S6. Detailed phylogenetic tree of Jen homologs, with all nominations and bootstrap values.

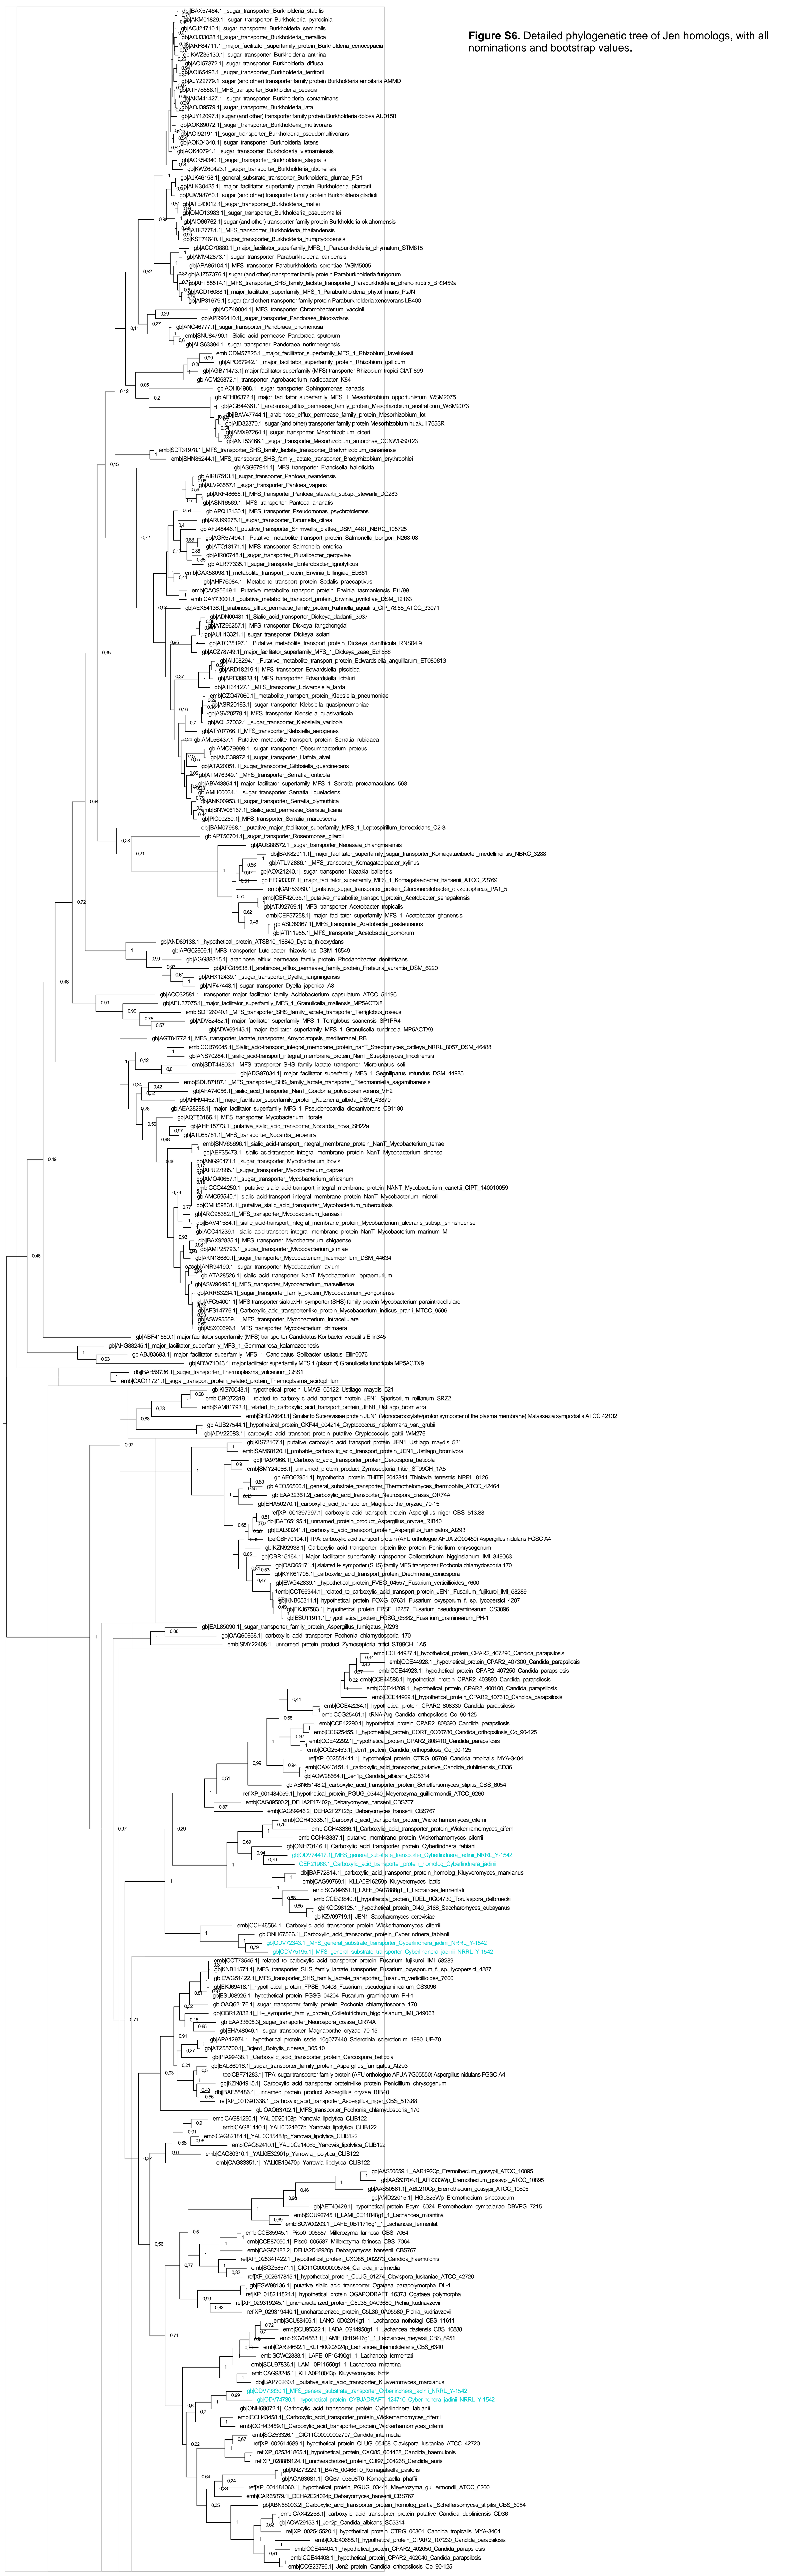



**Figure S7.** Detailed phylogenetic tree of Slc5 homologs, with all nominations and bootstrap values.

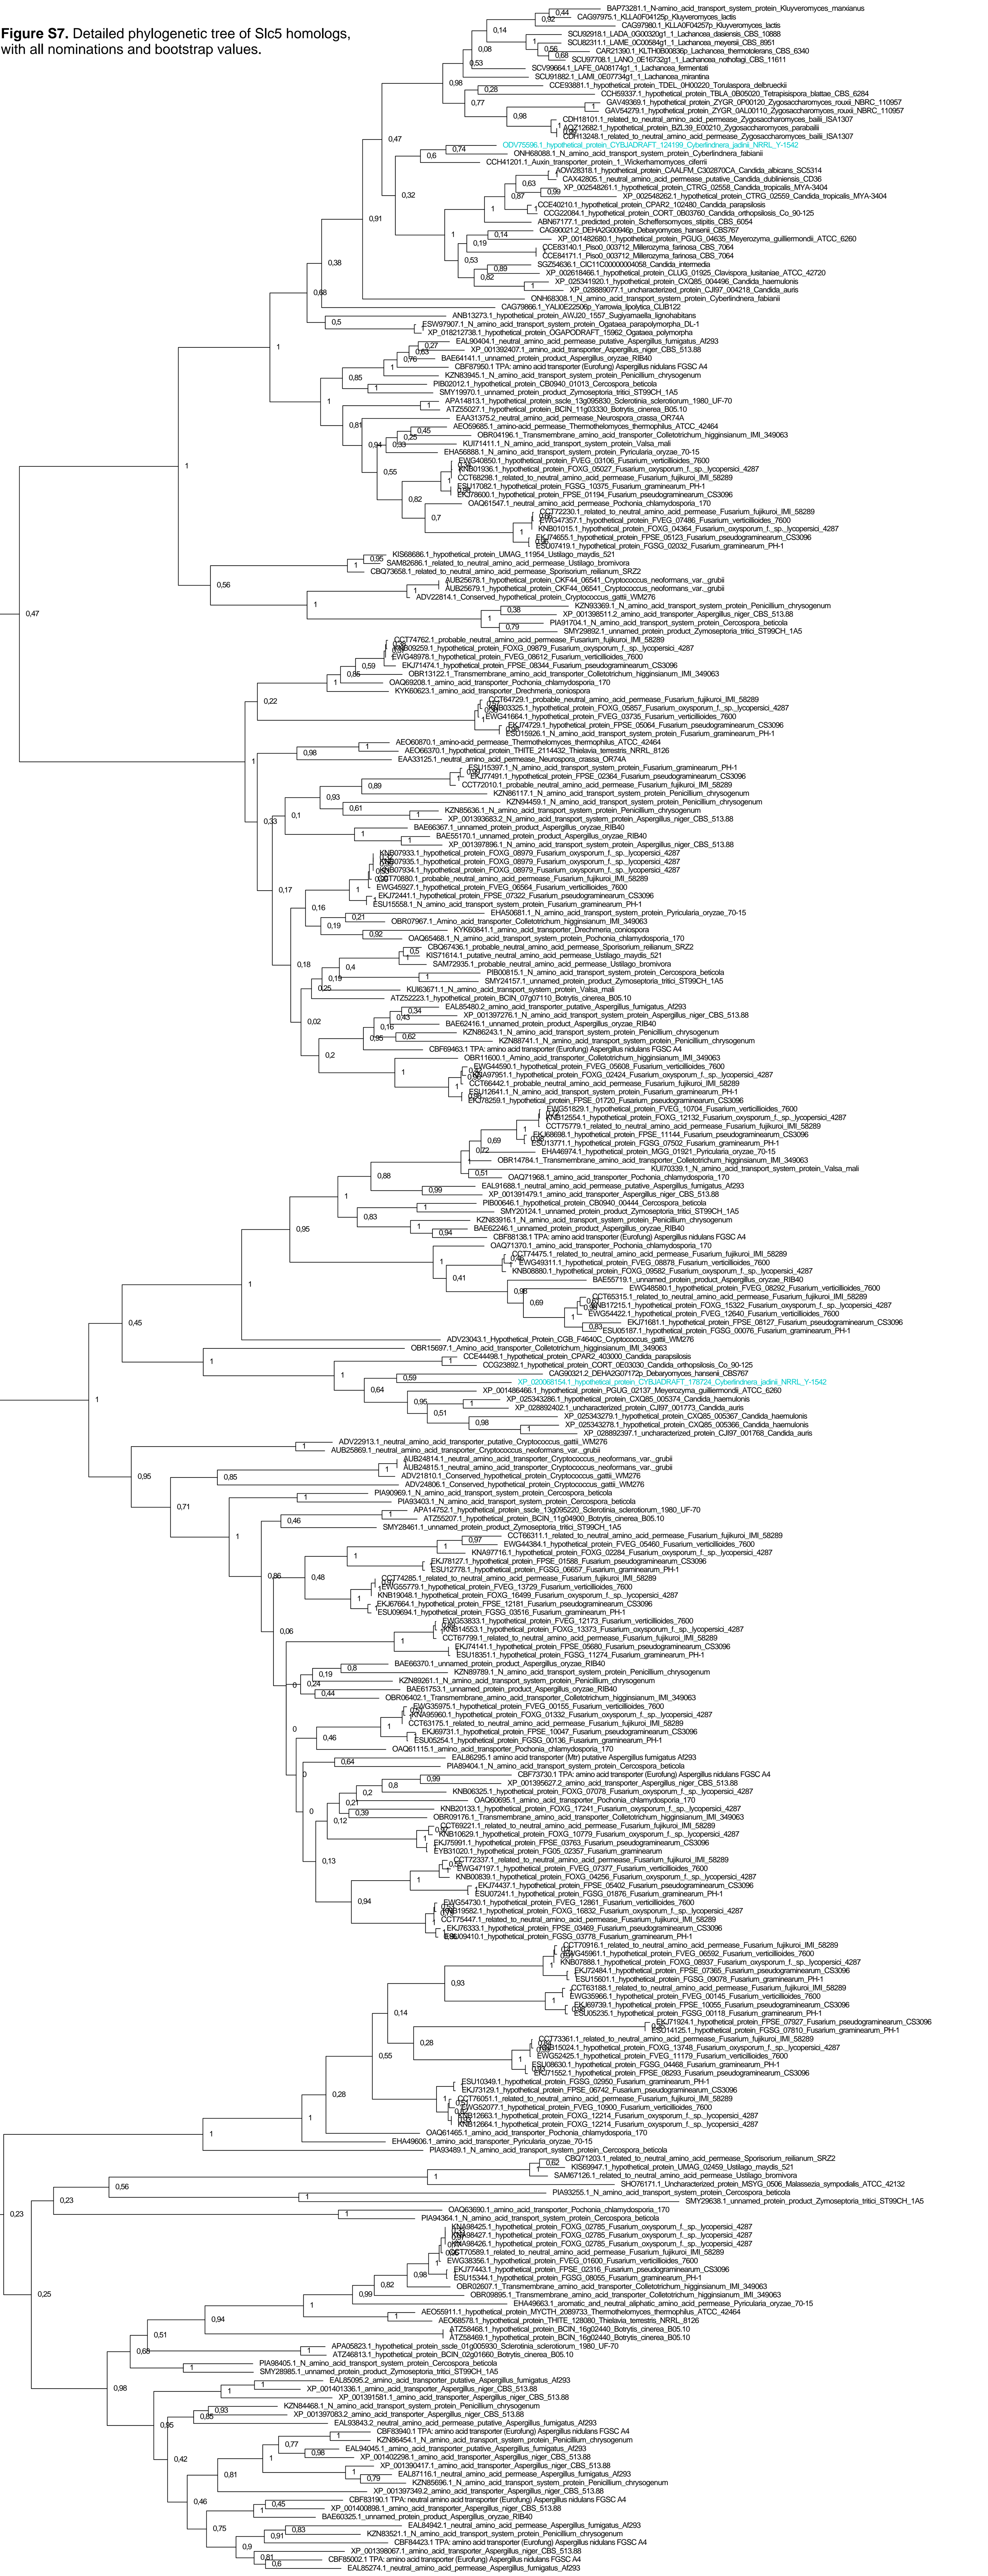

Supplement: s1 [file s1]
